# Supplementary material for: A single-cell resolved cell-cell communication model explains lineage commitment in hematopoiesis
Source: Oxford University Press journal article supplement (doi:10.1242/dev.199779), 2021-12-15
Supplement: dev199779supp.pdf [file dev199779supp.pdf]

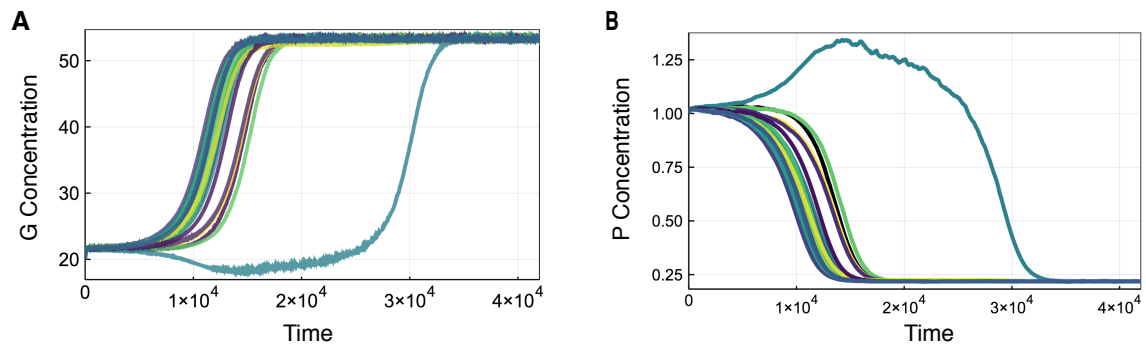

**Fig. S1.** Sample simulation of a loop of 20 cells with concentrations of both *G* and *P* over time. Parameters are set to  $\lambda = 28.0$  and  $A_0 = 1.0$ .

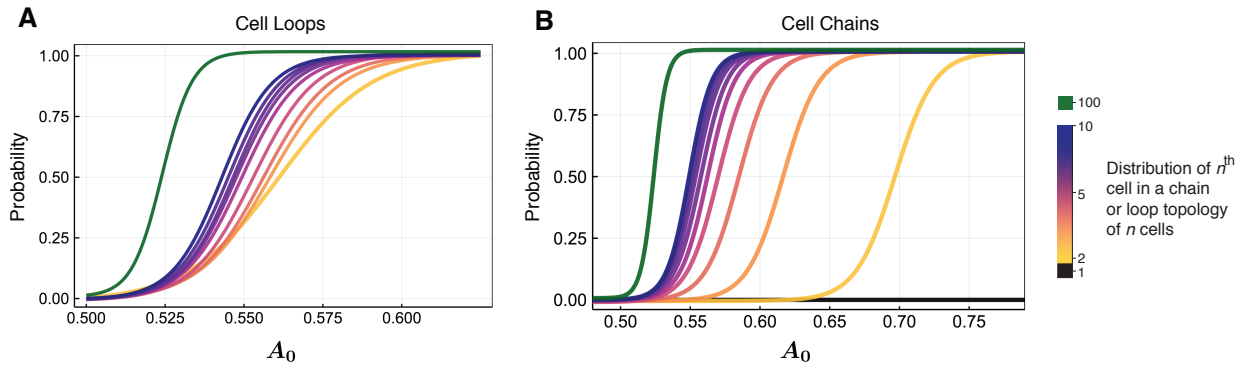

**Fig. S2.** Chains and loops of cells from Fig. 3A-3B along with curves where the number of cells  $n = 100$ . The number of simulation iterations was reduced to 100 per  $A_0$  value in simulations of 100 cell topologies.

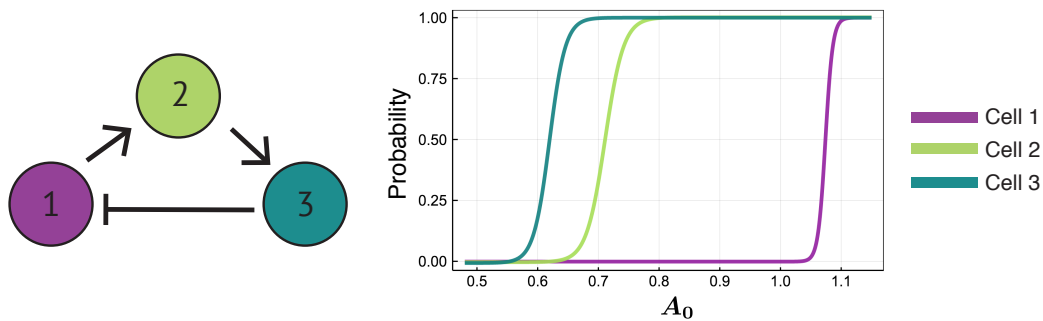

**Fig. S3.** Cell fate probability distributions for a loop of three cells with one inverse signal.

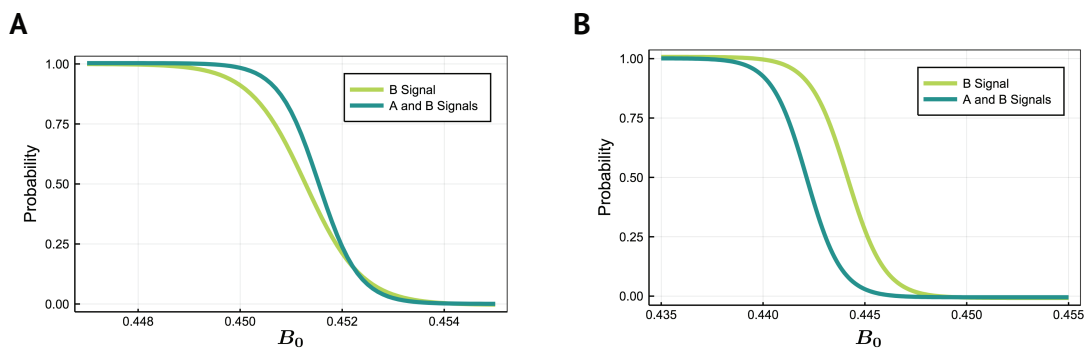

**Fig. S4.** Probability distributions of (A) cell two in a chain and (B) two cell loop converging to the G high state resulting from a consensus signal to the parameter  $B$  and dual consensus signals to both parameters  $A$  and  $B$ .  $A_0$  is fixed as 0.65. The signaling parameters for the signals changing  $A$  and  $B$  are  $\lambda_A = 28.0$  and  $\lambda_B = 28.0$  respectively.

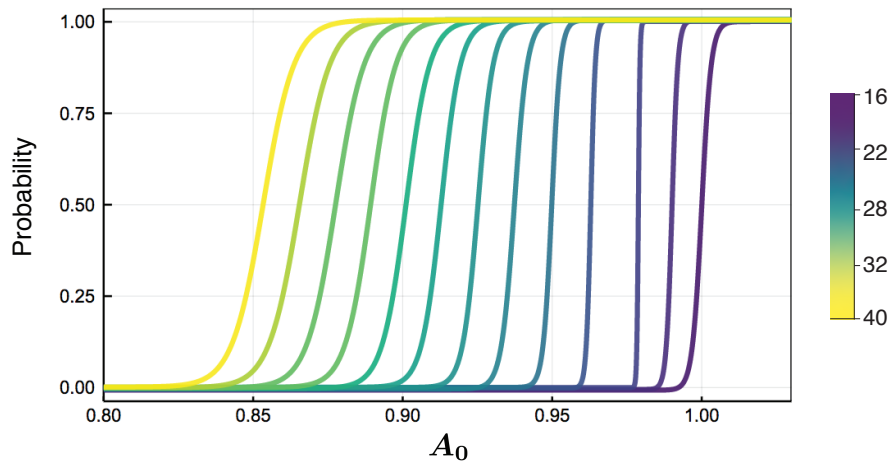

**Fig. S5.** Probability distributions of cell fate commitment to  $G$  high steady state for cell 2 in a chain of two cells with a dissensus signal where  $\kappa \in [16, 40]$ .

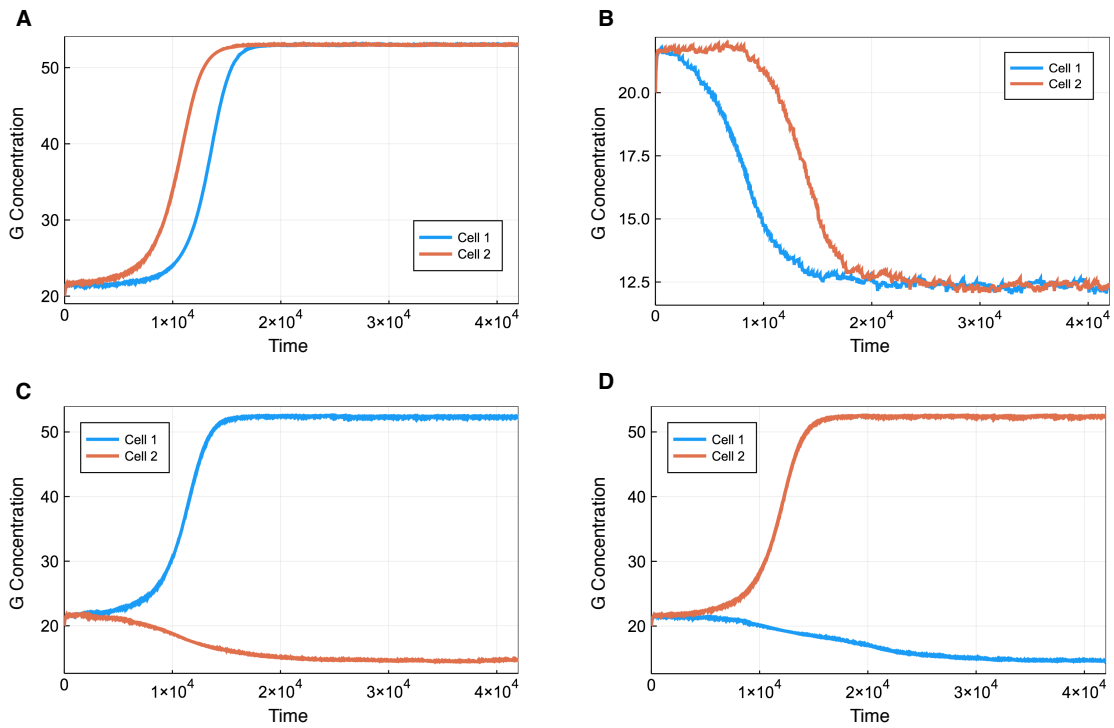

**Fig. S6.** (A)-(D) Sample trajectories of a loop of two cells with  $A_0 = 1.0175$  and  $\lambda = 40$ .

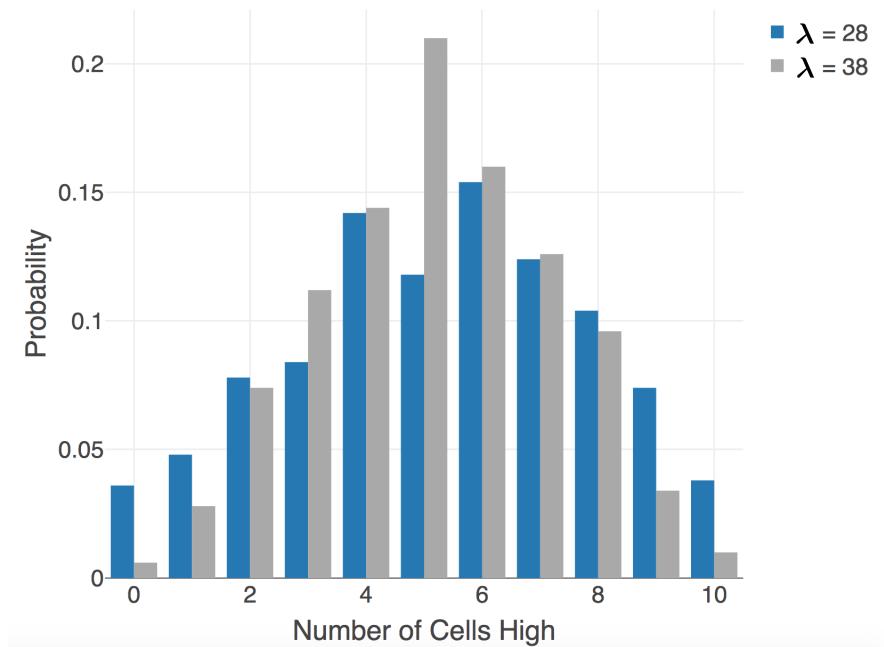

**Fig. S7.** Distributions of loops of 10 cells with different values of  $\lambda$ . The values of  $A_0$  were selected so that the distributions had similar expected values. For the blue distribution,  $A_0 = 0.9973$  and the expected value is 5.284. For the grey distribution,  $A_0 = 1.016$  and the expected value is 5.154

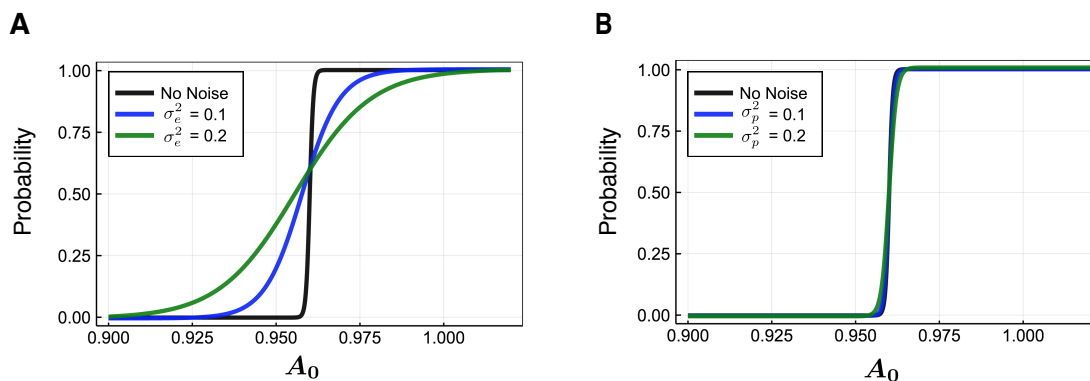

**Fig. S8.** Probability distributions that a given cell in a two cell loop will converge to the erythroid state with varying amounts of (A) extrinsic noise or (B) intrinsic noise.

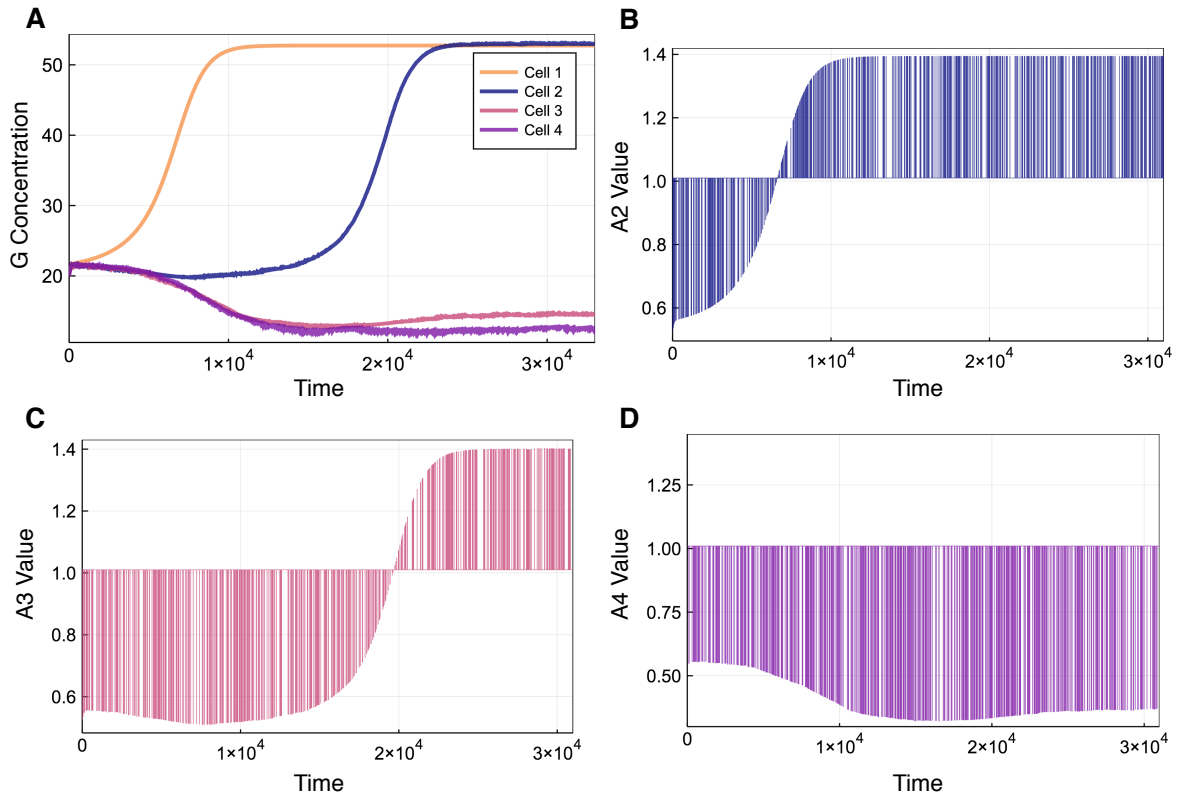

**Fig. S9.** (A) Sample trajectory of a chain of four cells where  $A_0 = 1.01$  and  $\lambda = 38.0$ . (B)-(D) Plots of  $A_2(t)$ ,  $A_3(t)$ , and  $A_4(t)$  over the same timescale as the trajectory.

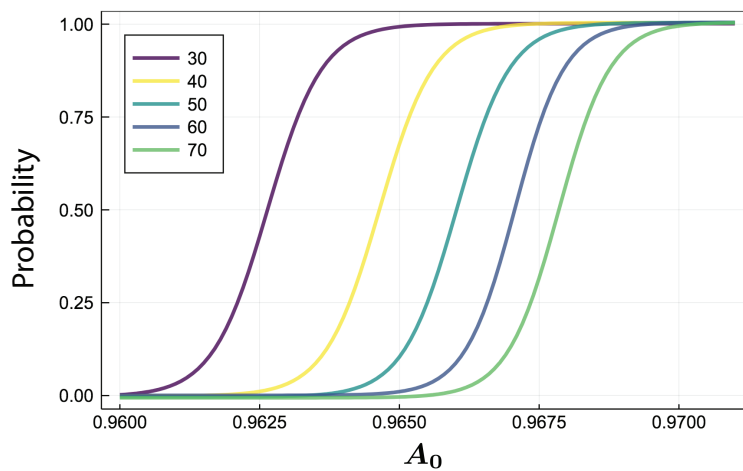

**Fig. S10.** Probability distributions of cell 2 in a chain of cells converging to the  $G$  high state where  $\lambda = 18$  with different mean wait times,  $\mu$ , given in the legend.

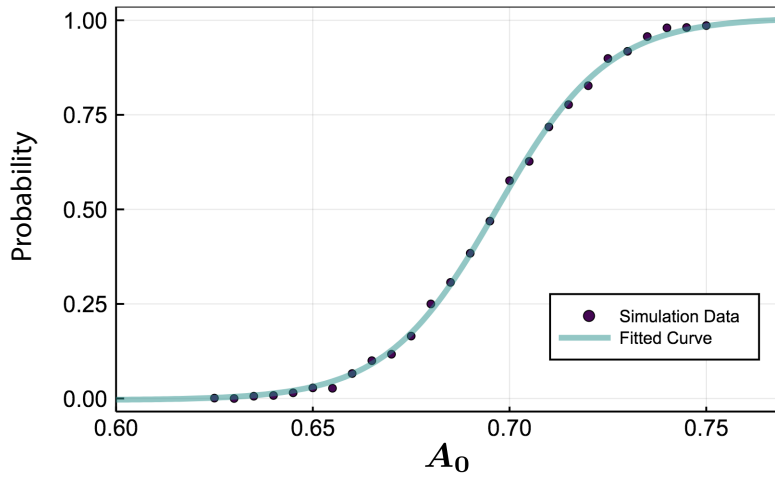

**Fig. S11.** Sample of simulated data points along with the fitted curve for cell 2 in a chain of cells where  $\lambda = 1$ .

**Table S1.** Parameter values used in the ODE system.

| $\alpha_1$ | $\alpha_2$ | $\alpha_3$ | $\alpha_4$ | $\alpha_5$ | $\beta_1$  | $\beta_2$  | $\beta_3$ | $\gamma_1$ | $\gamma_2$ |
|------------|------------|------------|------------|------------|------------|------------|-----------|------------|------------|
| 1.0        | 0.25       | 1.0        | 0.25       | 0.01       | 0.01       | 0.01       | 0.01      | 1.0        | 0.25       |
| $\gamma_3$ | $\gamma_4$ | $\gamma_5$ | $\gamma_6$ | $\gamma_7$ | $\gamma_8$ | $\gamma_9$ | $B$       | $C$        |            |
| 1.0        | 1.0        | 0.25       | 1.0        | 0.13       | 0.01       | 10.0       | 0.5       | 0          |            |
